# Supplementary material
Source: PubMed Central journal article supplement (PMC3624323)
Supplement: JVI.03575-12_zjv999097574so1.pdf [file JVI.03575-12_zjv999097574so1.pdf]

**Supplementary Table 1.** Primers used in the study\*.

| Target name                               | Primer sequence (5'-3')                                    |
|-------------------------------------------|------------------------------------------------------------|
| Artemis                                   | Fp = CAGTTCACCGAGACTCAGAGGA<br>Rp = CAGGCTGCTTTTCTGATACTGC |
| ATM                                       | Fp = CAGGGCAAAATCCTTCCTACTC<br>Rp = CCATGGTTTTCTCACAGCATCT |
| ATR                                       | Fp = GCGAGAGCCTTTAATGAGTGTC<br>Rp = TACACCTTG TAGTCGCTGCTC |
| DNAPKcs                                   | Fp = AAGGAGGGTCATGGATTCAAGA<br>Rp = ACCCAGGAGTAGCTCATCAAA  |
| H2AX                                      | Fp = GTTCCCAGTGGGCCGTGTA<br>Rp = CGGTGAGGTA CTCCAGCACT     |
| Ku70                                      | Fp = GTGATCTCCGAGATACAGGCAT<br>Rp = GCTGGATTCTCAAAGTGAACC  |
| Ku80                                      | Fp = GCGGTGGCTTTTCTCATATCA<br>Rp = GCATTCAACTGTGCCTCGGT    |
| Ligase4                                   | Fp = AGCCAGACAAAAGAGGTGAAGG<br>Rp = ATCATTCCACCCCGTGATCCT  |
| MRE11                                     | Fp = AGTAACCCAAGCCATACAAAGC<br>Rp = CCTCCACTATAGTCCACTCGCA |
| NBS1                                      | Fp = CAGAGCAAGCAGATACATGGGA<br>Rp = AGCTTGTTTTGCAGGACTCCTT |
| P53                                       | Fp = CCTGAGGTTGGCTCTGACTGTA<br>Rp = TCCGTCCCAGTAGATTACCAC  |
| Rad50                                     | Fp = GAACTGCTTGTTGAACAGGGTC<br>Rp = CACTGAATGGTCCACGCTCAAA |
| XRCC4                                     | Fp = TCTCTGGGTTGGCTTCAGCT<br>Rp = GCTGATTCTCCTGAGGAGCCAT   |
| SP1                                       | Fp = AAACGTACACACACAGGTGAGA<br>Rp = AAGTGCCCACTCAGAGCTA    |
| TRF2                                      | Fp = GAGGACAGCCAGAGTACTGAG<br>Rp = CCACTTGCCTTTGGGTACTTTG  |
| Ampicillin resistance (Amp <sup>r</sup> ) | Fp = CATCTTACGGATGGCATGAC<br>RP = CAACGATCAAGGCGAGTTAC     |

\*Primers used for KSHV whole episome ChIP assay have been described previously (PLoS Pathog. 2011 November; 7(11): e1002365.). Sequences of primers are available on request. TR primers have been described previously (J. Virol. 2011, 85(13):6148).
